# Supplementary material for: Huoxin pill prevents acute myocardial ischaemia injury via inhibition of Wnt/β‑catenin signaling
Source: PubMed Central journal article supplement (PMC8650034; doi:10.1111/jcmm.17028), 2021-11-16

# Supplemental Fig. 1

**A**

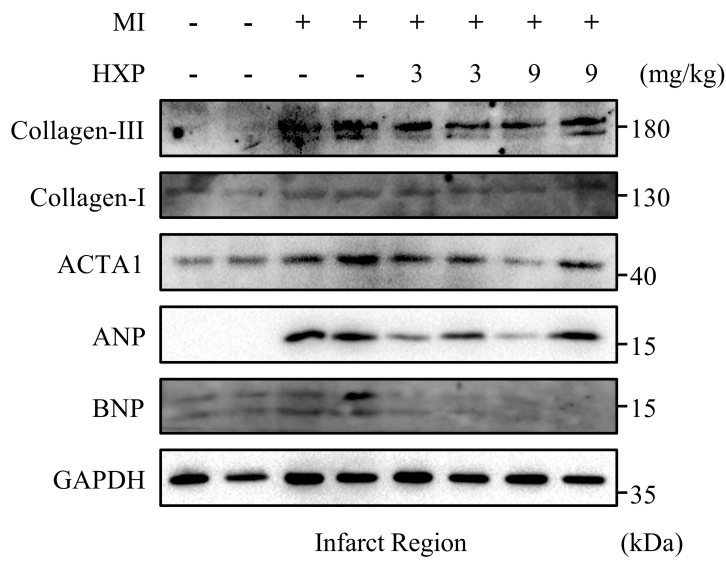

**B**

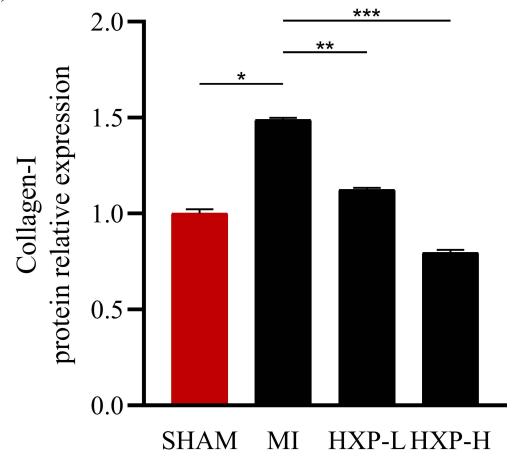

**C**

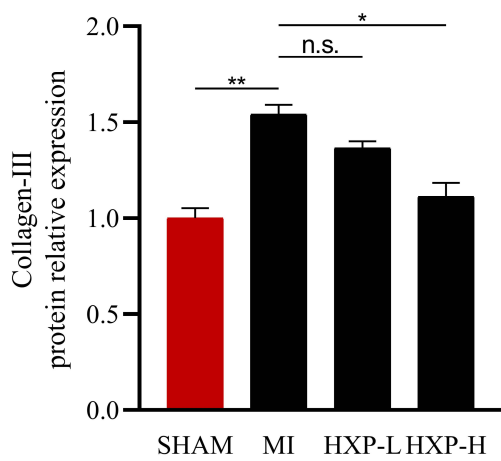

**D**

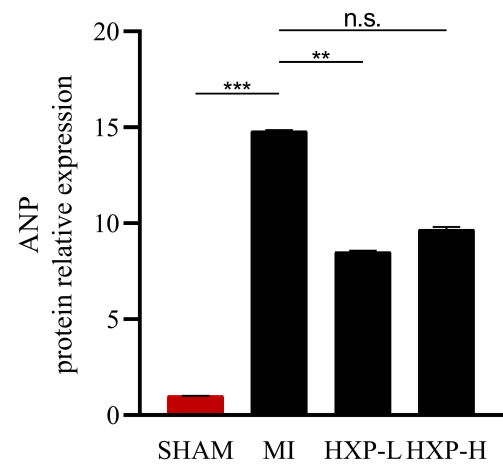

**E**

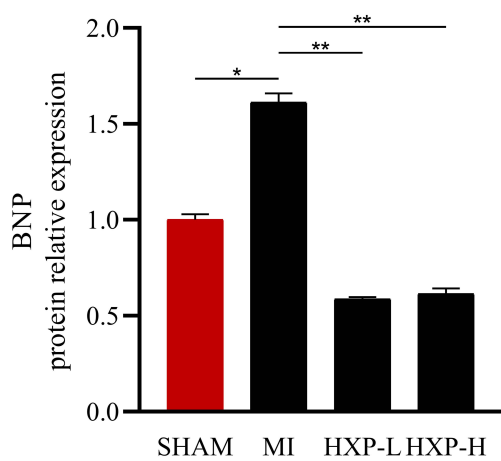

**F**

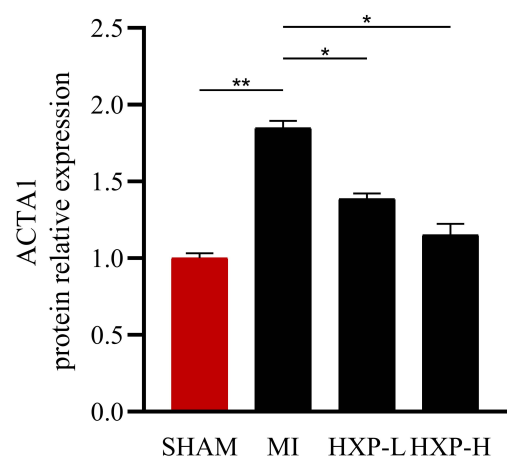

# Supplemental Fig. 2

A

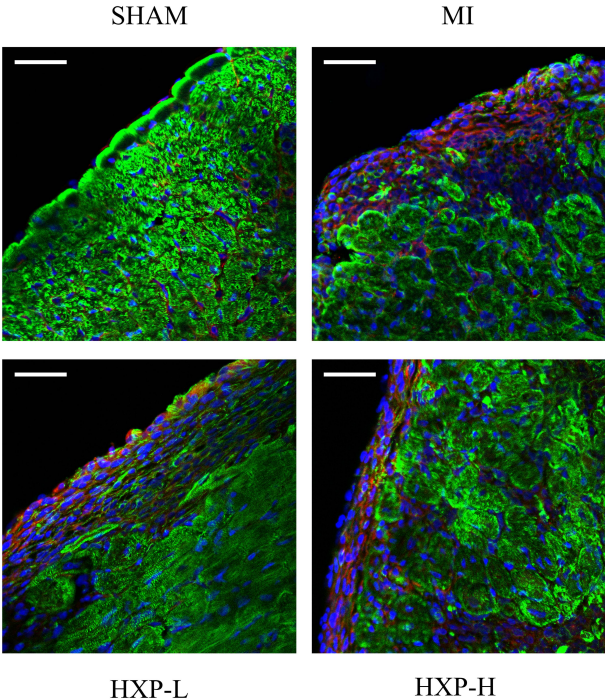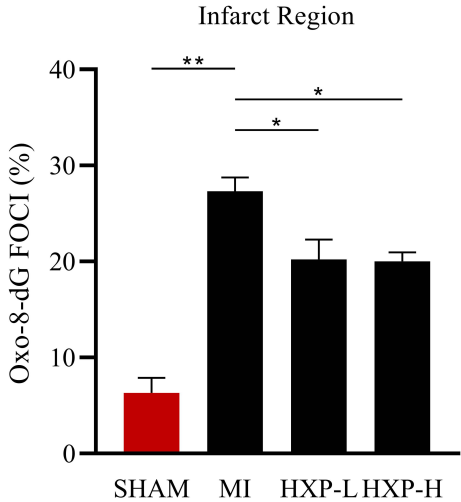

# Supplemental Fig. 3

## A

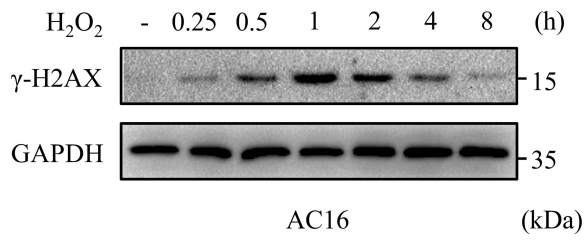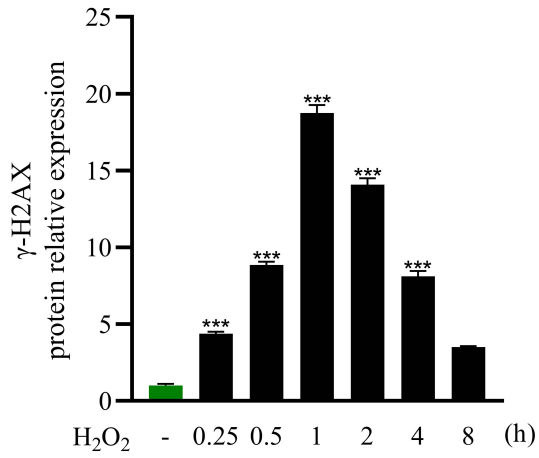

## B

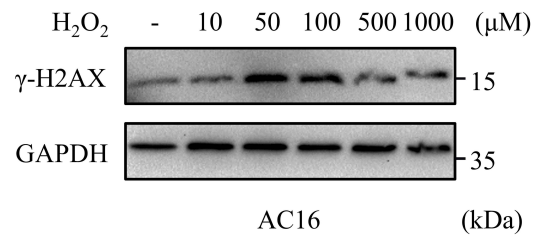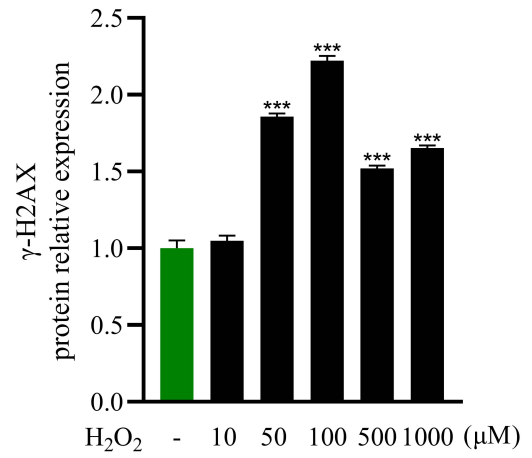

# Supplemental Fig. 4

## A

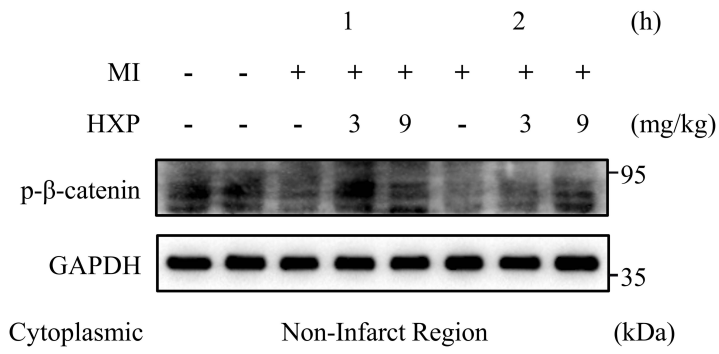

## B

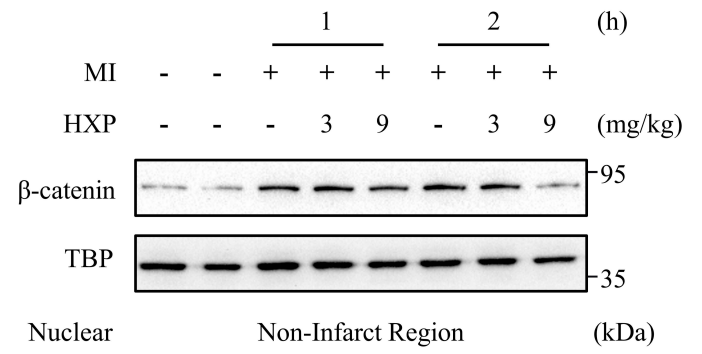

Supplement: JCMM-25-11053-s001.pdf [file JCMM-25-11053-s001.pdf]
